# Supplementary material
Source: PubMed Central journal article supplement (PMC6707855)
Supplement: NIHMS1531277-supplement-2.pdf [file NIHMS1531277-supplement-2.pdf]

**Supplementary Table 1. Listing of mouse strains employed.**

| <b>Mouse strain</b>                                                                           | <b>Description</b>                                                                                                                                                                                                                                                                                                                                                                                                                           |
|-----------------------------------------------------------------------------------------------|----------------------------------------------------------------------------------------------------------------------------------------------------------------------------------------------------------------------------------------------------------------------------------------------------------------------------------------------------------------------------------------------------------------------------------------------|
| <i>Foxp3</i> <sup>EGFP</sup>                                                                  | Knock-In strain expressing EGFP, under the control of the <i>Foxp3</i> promoter.                                                                                                                                                                                                                                                                                                                                                             |
| <i>R26</i> <sup>YFP</sup>                                                                     | Knock-In strain carrying a <i>loxP</i> -flanked STOP sequence followed by the Enhanced Yellow Fluorescent Protein gene inserted into the <i>Rosa26</i> locus.                                                                                                                                                                                                                                                                                |
| <i>Foxp3</i> <sup>EGFPCre</sup>                                                               | Strain expressing EGFP and Cre recombinase, under the control of the <i>Foxp3</i> promoter in a bacterial artificial chromosome.                                                                                                                                                                                                                                                                                                             |
| <i>Foxp3</i> <sup>EGFPCre</sup><br><i>R26</i> <sup>YFP</sup>                                  | Strain obtained by crossing <i>Foxp3</i> <sup>EGFPCre</sup> and <i>R26</i> <sup>YFP</sup> , allowing the expression of YFP in Treg and ex-Treg cells.                                                                                                                                                                                                                                                                                        |
| <i>Foxp3</i> <sup>K276X</sup>                                                                 | Knock-In strain carrying a targeted mutation of the <i>Foxp3</i> gene that contains the K276X nonsense mutation (A to T substitution in the first base position of codon 276), which creates a stop codon.                                                                                                                                                                                                                                   |
| <i>Foxp3</i> <sup>ΔEGFPCre</sup>                                                              | Knock-In strain carrying a bicistronic loss of function <i>Foxp3</i> allele that contained a <i>Frt</i> element inserted between exons 9 and 10 that created an aberrant 3' splice junction site leading to a premature stop codon in the <i>Foxp3</i> transcript and a ribosomal entry sequence inserted in the 3' untranslated region of <i>Foxp3</i> directed the expression of a EGFP protein and codon improved Cre recombinase (iCre). |
| <i>Foxp3</i> <sup>ΔEGFPCre</sup><br><i>R26</i> <sup>YFP</sup>                                 | Strain obtained by crossing <i>Foxp3</i> <sup>ΔEGFPCre</sup> and <i>R26</i> <sup>YFP</sup> , allowing the expression of YFP in ΔT <sub>reg</sub> and ex-ΔT <sub>reg</sub> cells.                                                                                                                                                                                                                                                             |
| <i>Foxp3</i> <sup>ΔEGFPCre/+</sup><br><i>R26</i> <sup>YFP</sup>                               | Strain carrying one wild-type and one <i>Foxp3</i> <sup>ΔEGFPCre</sup> allele allowing the generation both of wild-type T <sub>reg</sub> cells ( <i>Foxp3</i> <sup>+</sup> ) and ΔT <sub>reg</sub> cells (YFP <sup>+</sup> ) in female mice.                                                                                                                                                                                                 |
| <i>Foxp3</i> <sup>RFP</sup>                                                                   | Knock-In strain expressing RFP, under the control of the <i>Foxp3</i> promoter.                                                                                                                                                                                                                                                                                                                                                              |
| <i>Foxp3</i> <sup>ΔEGFPCre/RFP</sup><br><i>R26</i> <sup>YFP</sup>                             | Strain obtained by crossing <i>Foxp3</i> <sup>RFP</sup> and <i>Foxp3</i> <sup>ΔEGFPCre</sup> <i>R26</i> <sup>YFP</sup> allowing the visualization both of <i>Foxp3</i> -sufficient T <sub>reg</sub> cells (RFP <sup>+</sup> ) and ΔT <sub>reg</sub> cells (YFP <sup>+</sup> ) in female mice.                                                                                                                                                |
| <i>Rictor</i> <sup>Flox/Flox</sup>                                                            | <i>Rictor</i> <sup>Flox/Flox</sup> mice possess <i>loxP</i> sites flanking exon 3 of the RPTOR independent companion of MTOR, complex 2 ( <i>Rictor</i> ) gene.                                                                                                                                                                                                                                                                              |
| <i>Foxp3</i> <sup>ΔEGFPCre</sup><br><i>Rictor</i> <sup>Δ/Δ</sup>                              | Strain obtained by crossing <i>Foxp3</i> <sup>ΔEGFPCre</sup> and <i>Rictor</i> <sup>Flox/Flox</sup> , allowing the deletion of <i>Rictor</i> in ΔT <sub>reg</sub> cells.                                                                                                                                                                                                                                                                     |
| <i>Foxp3</i> <sup>ΔEGFPCre</sup><br><i>Rictor</i> <sup>ΔWT</sup>                              | Strain obtained by crossing <i>Foxp3</i> <sup>ΔEGFPCre</sup> and one allele <i>Rictor</i> <sup>Flox/Flox</sup> , allowing the deletion of only one allele of <i>Rictor</i> in ΔT <sub>reg</sub> cells.                                                                                                                                                                                                                                       |
| <i>Foxp3</i> <sup>ΔEGFPCre</sup><br><i>Rictor</i> <sup>Δ/Δ</sup> <i>R26</i> <sup>YFP</sup>    | Strain obtained by crossing <i>Foxp3</i> <sup>ΔEGFPCre</sup> <i>Rictor</i> <sup>Δ/Δ</sup> and <i>R26</i> <sup>YFP</sup> , allowing the expression of YFP and the deletion of <i>Rictor</i> specifically in ΔT <sub>reg</sub> cells.                                                                                                                                                                                                          |
| <i>Foxp3</i> <sup>ΔEGFPCre/+</sup><br><i>Rictor</i> <sup>Δ/Δ</sup> <i>R26</i> <sup>YFP</sup>  | Strain carrying one wild-type and one <i>Foxp3</i> <sup>ΔEGFPCre</sup> allele allowing the generation both of wild-type T <sub>reg</sub> cells ( <i>Foxp3</i> <sup>+</sup> ) and <i>Rictor</i> -deficient ΔT <sub>reg</sub> cells (YFP <sup>+</sup> ) in female mice.                                                                                                                                                                        |
| <i>Rptor</i> <sup>Flox/Flox</sup>                                                             | Knock In strain carrying a <i>loxP</i> sites flanking exon 6 of the targeted <i>Rptor</i> (regulatory associated protein of MTOR, complex 1) gene.                                                                                                                                                                                                                                                                                           |
| <i>Foxp3</i> <sup>ΔEGFPCre</sup><br><i>Rptor</i> <sup>Δ/Δ</sup>                               | Strain obtained by crossing <i>Foxp3</i> <sup>ΔEGFPCre</sup> and <i>Rptor</i> <sup>Flox/Flox</sup> , allowing the deletion of <i>Rptor</i> in ΔT <sub>reg</sub> cells.                                                                                                                                                                                                                                                                       |
| <i>Foxp3</i> <sup>ΔEGFPCre</sup><br><i>Rptor</i> <sup>ΔWT</sup>                               | Strain obtained by crossing <i>Foxp3</i> <sup>ΔEGFPCre</sup> and one allele <i>Rptor</i> <sup>Flox/Flox</sup> , allowing the deletion of only one <i>Rptor</i> allele in ΔT <sub>reg</sub> cells.                                                                                                                                                                                                                                            |
| <i>Foxp3</i> <sup>ΔEGFPCre</sup><br><i>Rictor</i> <sup>Δ/Δ</sup> <i>Rptor</i> <sup>Δ/Δ</sup>  | Strain obtained by crossing <i>Foxp3</i> <sup>ΔEGFPCre</sup> , <i>Rictor</i> <sup>Flox/Flox</sup> and <i>Rptor</i> <sup>Flox/Flox</sup> , allowing the deletion of <i>Rictor</i> and <i>Rptor</i> in ΔT <sub>reg</sub> cells.                                                                                                                                                                                                                |
| <i>Foxo1</i> <sup>Flox/Flox</sup>                                                             | Knock-In strain carrying a <i>loxP</i> sites flanking exon 2 of the forkhead box O1 ( <i>Foxo1</i> ) gene.                                                                                                                                                                                                                                                                                                                                   |
| <i>Foxp3</i> <sup>ΔEGFPCre</sup><br><i>Foxo1</i> <sup>Δ/Δ</sup>                               | Strain obtained by crossing <i>Foxp3</i> <sup>ΔEGFPCre</sup> and <i>Foxo1</i> <sup>Flox/Flox</sup> allowing the deletion of <i>Foxo1</i> in ΔT <sub>reg</sub> cells.                                                                                                                                                                                                                                                                         |
| <i>Foxp3</i> <sup>ΔEGFPCre</sup><br><i>Rictor</i> <sup>Δ/Δ</sup> <i>Foxo1</i> <sup>Δ/Δ</sup>  | Strain obtained by crossing <i>Foxp3</i> <sup>ΔEGFPCre</sup> , <i>Rictor</i> <sup>Flox/Flox</sup> and <i>Foxo1</i> <sup>Flox/Flox</sup> , allowing the deletion of <i>Rictor</i> and <i>Foxo1</i> in ΔT <sub>reg</sub> cells.                                                                                                                                                                                                                |
| <i>R26</i> <sup>Foxo1AAA</sup>                                                                | Knock-In strain carrying a <i>loxP</i> -flanked STOP sequence followed by the a modified <i>Foxo1</i> gene inserted into the <i>Rosa26</i> locus, allowing the expression of unsensitized to phosphorylation and constitutively active <i>Foxo1</i> in cells expressing Cre recombinase.                                                                                                                                                     |
| <i>Foxp3</i> <sup>ΔEGFPCre</sup><br><i>R26</i> <sup>Foxo1AAA</sup>                            | Strain obtained by crossing <i>Foxp3</i> <sup>ΔEGFPCre</sup> and <i>R26</i> <sup>Foxo1AAA</sup> allowing the expression of the constitutively active <i>Foxo1</i> specifically in ΔTreg cells.                                                                                                                                                                                                                                               |
| <i>Pfkfb3</i> <sup>Flox/Flox</sup>                                                            | Knock-In strain carrying a <i>loxP</i> sites flanking exon of the <i>pfkfb3</i> gene, encoding for 6-Phosphofructo-2-Kinase/Fructose-2,6-Biphosphatase 3, a powerful stimulator a glycolysis.                                                                                                                                                                                                                                                |
| <i>Foxp3</i> <sup>ΔEGFPCre</sup><br><i>Pfkfb3</i> <sup>Δ/Δ</sup>                              | Strain obtained by crossing <i>Foxp3</i> <sup>ΔEGFPCre</sup> and <i>Pfkfb3</i> <sup>Flox/Flox</sup> allowing the deletion of <i>Pfkfb3</i> specifically in ΔTreg cells.                                                                                                                                                                                                                                                                      |
| <i>Foxp3</i> <sup>ΔEGFPCre</sup><br><i>Rictor</i> <sup>Δ/Δ</sup> <i>Pfkfb3</i> <sup>Δ/Δ</sup> | Strain obtained by crossing <i>Foxp3</i> <sup>ΔEGFPCre</sup> , <i>Rictor</i> <sup>Flox/Flox</sup> and <i>Pfkfb3</i> <sup>Flox/Flox</sup> allowing the concurrent deletion of <i>Rictor</i> and <i>Pfkfb3</i> specifically in ΔTreg cells.                                                                                                                                                                                                    |
| <i>Foxp3</i> <sup>YFPCre</sup>                                                                | Knock-In strain expressing YFP and Cre recombinase under the control of the <i>Foxp3</i> promoter.                                                                                                                                                                                                                                                                                                                                           |

|                                                                           |                                                                                                                                                                                                      |
|---------------------------------------------------------------------------|------------------------------------------------------------------------------------------------------------------------------------------------------------------------------------------------------|
| <i>Foxp3</i> <sup>YFP<sup>Cre</sup></sup><br><i>Rictor</i> <sup>Δ/Δ</sup> | Strain obtained by crossing <i>Foxp3</i> <sup>YFP<sup>Cre</sup></sup> and <i>Rictor</i> <sup>Flox/Flox</sup> allowing the concurrent deletion of Rictor specifically in Foxp3-sufficient Treg cells. |
| CD45.1 <i>Foxp3</i> <sup>EGFP</sup>                                       | Strain expressing the congenic marker CD45.1 in hematopoietic cell lineage and EGFP in T <sub>reg</sub> cells                                                                                        |
| <i>CD4</i> <sup>Cre</sup>                                                 | Knock-In strain expressing Cre recombinase under the control of the CD4 promoter.                                                                                                                    |
| <i>CD4</i> <sup>Cre</sup> <i>Rictor</i> <sup>Δ/Δ</sup>                    | Strain obtained by crossing <i>CD4</i> <sup>Cre</sup> and <i>Rictor</i> <sup>Flox/Flox</sup> allowing the deletion of Rictor specifically in CD4 and CD8 cells in periphery.                         |

**Supplementary Table 2. Listing of mouse antibodies used.**

| Marker                | Fluorochrome | clone        | compagny       | dilution | Staining      |
|-----------------------|--------------|--------------|----------------|----------|---------------|
| Foxp3                 | eF450        | FJK-16S      | eBioscience    | 1/500    | Intracellular |
|                       | PE           | NRRF-30      | eBioscience    | 1/500    | Intracellular |
| Gata-3                | eF660        | TWAJ         | eBioscience    | 1/300    | Intracellular |
| ROR $\gamma$ t        | PE           | B2D          | BD             | 1/200    | Intracellular |
| T-Bet                 | Percp-Cy5.5  | eBio4B10     | eBioscience    | 1/300    | Intracellular |
| Blimp-1               | PE           | 5E7          | Biologend      | 1/300    | Intracellular |
| CTLA4                 | PE           | UC10-4B9     | eBioscience    | 1/300    | Intracellular |
| Helios                | APC          | 22F6         | eBioscience    | 1/300    | Intracellular |
| IFN- $\gamma$         | APC          | XMG1.2       | Biologend      | 1/500    | Intracellular |
| IL-17A                | PE-Cy7       | TC11-18H10.1 | Biologend      | 1/500    | Intracellular |
|                       | PE           | TC11-18H10.1 | Biologend      | 1/500    | Intracellular |
| IL-4                  | PE           | 11B11        | Biologend      | 1/300    | Intracellular |
| IL-10                 | AF700        | JES5-16E3    | eBioscience    | 1/300    | Intracellular |
| CD4                   | BV605        | RM4-5        | Biologend      | 1/500    | Surface       |
|                       | PE           | RM4-5        | Biologend      | 1/500    | Surface       |
| CD8                   | PE           | 53-6.7       | eBioscience    | 1/500    | Surface       |
| CD62L                 | APC          | MEL-14       | Biologend      | 1/300    | Surface       |
| CD44                  | eF450        | IM7          | eBioscience    | 1/300    | Surface       |
| CD90.2                | APC-Cy7      | 30-H12       | Biologend      | 1/500    | Surface       |
| CD25                  | PE-Cy7       | PC61         | Biologend      | 1/500    | Surface       |
| ICOS                  | PE           | 7E.17G9      | eBioscience    | 1/300    | Surface       |
| Nrp1                  | PE           | 3DS304M      | eBioscience    | 1/300    | Surface       |
| GITR                  | PE           | DTA-1        | eBioscience    | 1/300    | Surface       |
| CD73                  | APC          | TY/11.8      | Biologend      | 1/300    | Surface       |
| CD45RB                | APC          | C363.16A     | eBioscience    | 1/500    | Surface       |
| CD45.1                | PE-Cy7       | A20          | Biologend      | 1/500    | Surface       |
| CD45.2                | AF700        | 104          | Biologend      | 1/500    | Surface       |
| Viability dye         | eFluor506    |              | Biologend      | 1/1000   | Surface       |
| p <sub>T308</sub> AKT | PE           |              | BD             | 1/100    | Post-Methanol |
| p <sub>S473</sub> AKT | PE           | D9E          | Cell signaling | 1/100    | Post-Methanol |
| pS6                   | PE           | cupk43k      | eBioscience    | 1/100    | Post-Methanol |
| p4EBP                 | eF660        | V3NTY24      | eBioscience    | 1/100    | Post-Methanol |

**Supplementary Table 3. Listing of human antibodies used.**

| <b>Marker</b> | <b>Fluorochrome</b> | <b>clone</b> | <b>compagny</b> | <b>dilution</b> | <b>Staining</b> |
|---------------|---------------------|--------------|-----------------|-----------------|-----------------|
| FOXP3         | BV421               | 206D         | Biologend       | 1/300           | Intracellular   |
| CTLA-4        | PE                  | 14D3         | eBioscience     | 1/300           | Intracellular   |
| HELIOS        | APC                 | 22F6         | eBioscience     | 1/300           | Intracellular   |
| IFN- $\gamma$ | APC                 | 4S.B3        | Biologend       | 1/300           | Intracellular   |
| IL-4          | PE                  | 8D4-8        | Biologend       | 1/300           | Intracellular   |
| CD4           | Percp-Cy5.5         | RPA-T4       | eBioscience     | 1/300           | Surface         |
| CD127         | PE-Cy7              | A019D5       | Biologend       | 1/500           | Surface         |
| CD25          | FITC                | 2A3          | BD              | 1/100           | Surface         |
| p473AKT       | PE                  | D9E          | Cell signaling  | 1/100           | Post-Methanol   |

**Supplementary Table 4. Listing of immunoblotting antibodies used.**

| <b>Marker</b>            | <b>Source</b> | <b>clone</b> | <b>compagny</b> | <b>dilution</b> |
|--------------------------|---------------|--------------|-----------------|-----------------|
| Foxp3                    | Rabbit        | Polyclonal   | MBL             | 1/500           |
| Rictor                   | Rabbit        | D16H9        | Cell signaling  | 1/1000          |
| Pten                     | Rabbit        | D4.3         | Cell signaling  | 1/1000          |
| Phlpp1                   | Rabbit        | Polyclonal   | ThermoFisher    | 1/500           |
| pY <sup>319</sup> -ZAP70 | Rabbit        | Polyclonal   | Cell signaling  | 1/1000          |
| ZAP70                    | Rabbit        | 99F2         | Cell signaling  | 1/1000          |
| $\beta$ -actin           | Rabbit        | 13E5         | Cell signaling  | 1/5000          |
| Rabbit IgG-HRP           | Goat          | RPA-T4       | Cell signaling  | 1/5000          |
